# Supplementary material for: Metabolomics Analysis of Different Tissues of Lonicera japonica Thunb. Based on Liquid Chromatography with Mass Spectrometry
Source: MDPI journal article supplement (doi:10.3390/metabo13020186), 2023-01-27
Supplement: s1 [file s1]

# Supplementary Materials

## Metabolomics analysis of different tissues of *Lonicera japonica* Thunb. based on liquid chromatography with mass spectrometry

Yan Wang <sup>1,2</sup>, Lili Li <sup>1,3\*</sup>, Wenhua Ji <sup>1,3</sup>, Shuang Liu <sup>1,3</sup>, Jiali Fan <sup>1,3</sup>, Heng Lu <sup>1,3</sup>,  
Xiao Wang <sup>1,3\*</sup>

<sup>1</sup> Key Laboratory for Applied Technology of Sophisticated Analytical Instruments of Shandong Province, Shandong Analysis and Test Center, Qilu University of Technology, Shandong Academy of Sciences, Jinan 250014, China  
<sup>2</sup> College of Traditional Chinese Medicine, Yunnan University of Chinese Medicine, Kunming 650000, China  
<sup>3</sup> School of Pharmaceutical Sciences, Qilu University of Technology, Shandong Academy of Sciences, Jinan 250014, China  
\* Correspondence: correspondence to: Lili Li, liliouc@126.com; Xiao Wang, wangx@sdas.org.

Table S1. Identification of primary metabolites in LJT.

| No. | Name                    | tr/min | <i>m/z</i> | Classification | Mode               |
|-----|-------------------------|--------|------------|----------------|--------------------|
| 1   | Glutamine               | 0.70   | 147.0760   | Amino acids    | [M+H] <sup>+</sup> |
| 2   | Serine                  | 0.70   | 106.0500   | Amino acids    | [M+H] <sup>+</sup> |
| 3   | Phenylalanine           | 2.10   | 166.0860   | Amino acids    | [M+H] <sup>+</sup> |
| 4   | Tyrosine                | 0.90   | 182.0810   | Amino acids    | [M+H] <sup>+</sup> |
| 5   | Valine                  | 0.90   | 118.0860   | Amino acids    | [M+H] <sup>+</sup> |
| 6   | Leucine                 | 1.20   | 132.1020   | Amino acids    | [M+H] <sup>+</sup> |
| 7   | Glutamic acid           | 0.70   | 148.0600   | Amino acids    | [M+H] <sup>+</sup> |
| 8   | Proline                 | 0.80   | 116.0700   | Amino acids    | [M+H] <sup>+</sup> |
| 9   | Tryptophan              | 4.00   | 205.0970   | Amino acids    | [M+H] <sup>+</sup> |
| 10  | Adenosine monophosphate | 1.00   | 348.0710   | Nucleotides    | [M+H] <sup>+</sup> |
| 11  | Guanosine               | 1.30   | 284.0990   | Nucleotides    | [M+H] <sup>+</sup> |
| 12  | Guanine                 | 1.30   | 152.0570   | Nucleotides    | [M+H] <sup>+</sup> |
| 13  | Adenine                 | 1.20   | 136.0620   | Nucleotides    | [M+H] <sup>+</sup> |
| 14  | Adenosine               | 1.20   | 268.1040   | Nucleotides    | [M+H] <sup>+</sup> |
| 15  | 5'-Methylthioadenosine  | 4.30   | 298.0970   | Nucleotides    | [M+H] <sup>+</sup> |
| 16  | FA 16:1                 | 34.11  | 253.2176   | Fatty acids    | [M-H] <sup>-</sup> |
| 17  | FA 16:3                 | 31.80  | 249.1499   | Fatty acids    | [M-H] <sup>-</sup> |
| 18  | FA 18:0                 | 37.10  | 283.2643   | Fatty acids    | [M-H] <sup>-</sup> |
| 19  | FA 18:1                 | 35.66  | 281.2488   | Fatty acids    | [M-H] <sup>-</sup> |
| 20  | FA 18:2                 | 34.40  | 279.2328   | Fatty acids    | [M-H] <sup>-</sup> |
| 21  | FA 18:3                 | 33.30  | 277.2170   | Fatty acids    | [M-H] <sup>-</sup> |
| 22  | FA 18:4                 | 29.17  | 275.1995   | Fatty acids    | [M-H] <sup>-</sup> |
| 23  | FA 20:0                 | 31.79  | 311.2011   | Fatty acids    | [M-H] <sup>-</sup> |
| 24  | FA 20:6                 | 27.55  | 299.1866   | Fatty acids    | [M-H] <sup>-</sup> |

|    |                                                                             |       |          |             |                    |
|----|-----------------------------------------------------------------------------|-------|----------|-------------|--------------------|
| 25 | FA 22:5                                                                     | 36.50 | 329.2961 | Fatty acids | [M-H] <sup>-</sup> |
| 26 | OxFA 16:2                                                                   | 29.16 | 265.1480 | Fatty acids | [M-H] <sup>-</sup> |
| 27 | OxFA 18:0                                                                   | 31.67 | 297.1749 | Fatty acids | [M-H] <sup>-</sup> |
| 28 | OxFA 18:1                                                                   | 30.14 | 295.2281 | Fatty acids | [M-H] <sup>-</sup> |
| 29 | OxFA 18:2                                                                   | 29.21 | 293.2125 | Fatty acids | [M-H] <sup>-</sup> |
| 30 | OxFA 18:3                                                                   | 29.55 | 291.1970 | Fatty acids | [M-H] <sup>-</sup> |
| 31 | OxFA 18:5                                                                   | 25.12 | 287.2229 | Fatty acids | [M-H] <sup>-</sup> |
| 32 | Lyso PC 14:0                                                                | 29.80 | 468.3085 | Lipids      | [M+H] <sup>+</sup> |
| 33 | Lyso PC 16:0                                                                | 30.20 | 496.3398 | Lipids      | [M+H] <sup>+</sup> |
| 34 | Lyso PC 16:1                                                                | 28.70 | 494.3243 | Lipids      | [M+H] <sup>+</sup> |
| 35 | Lyso PC 18:0                                                                | 30.80 | 524.3698 | Lipids      | [M+H] <sup>+</sup> |
| 36 | Lyso PC 18:1 sn-1                                                           | 29.30 | 522.3561 | Lipids      | [M+H] <sup>+</sup> |
| 37 | Lyso PC 18:1 sn-2                                                           | 30.80 | 522.3561 | Lipids      | [M+H] <sup>+</sup> |
| 38 | Lyso PC 18:2 sn-1                                                           | 28.40 | 520.3398 | Lipids      | [M+H] <sup>+</sup> |
| 39 | Lyso PC 18:2 sn-2                                                           | 29.30 | 520.3398 | Lipids      | [M+H] <sup>+</sup> |
| 40 | Lyso PC 18:3 sn-1                                                           | 28.10 | 518.3239 | Lipids      | [M+H] <sup>+</sup> |
| 41 | Lyso PC 18:3 sn-2                                                           | 28.30 | 518.3239 | Lipids      | [M+H] <sup>+</sup> |
| 42 | Lyso PC 19:3 sn-1                                                           | 28.90 | 532.3411 | Lipids      | [M+H] <sup>+</sup> |
| 43 | Lyso PC 19:3 sn-2                                                           | 29.10 | 532.3411 | Lipids      | [M+H] <sup>+</sup> |
| 44 | Lyso PE 16:0 sn-1                                                           | 29.10 | 454.2939 | Lipids      | [M+H] <sup>+</sup> |
| 45 | Lyso PE 16:0 sn-2                                                           | 29.30 | 454.2939 | Lipids      | [M+H] <sup>+</sup> |
| 46 | Lyso PE 18:0                                                                | 31.30 | 482.3231 | Lipids      | [M+H] <sup>+</sup> |
| 47 | Lyso PE 18:1                                                                | 29.80 | 480.3100 | Lipids      | [M+H] <sup>+</sup> |
| 48 | Lyso PE 18:2sn-1                                                            | 28.60 | 478.2925 | Lipids      | [M+H] <sup>+</sup> |
| 49 | Lyso PE 18:2sn-2                                                            | 28.70 | 478.2925 | Lipids      | [M+H] <sup>+</sup> |
| 50 | Lyso PE 18:3sn-1                                                            | 27.70 | 476.2772 | Lipids      | [M+H] <sup>+</sup> |
| 51 | Lyso PE 18:3sn-2                                                            | 27.90 | 476.2772 | Lipids      | [M+H] <sup>+</sup> |
| 52 | PC 30:6 sn-1                                                                | 27.40 | 694.4457 | Lipids      | [M+H] <sup>+</sup> |
| 53 | PC 30:6 sn-2                                                                | 27.70 | 694.4457 | Lipids      | [M+H] <sup>+</sup> |
| 54 | Demethyl-vanillic acid 4- <i>O</i> -β-D-6- <i>O</i> -benzoylglucopyranoside | 19.75 | 419.0985 | others      | [M-H] <sup>-</sup> |
| 55 | Pinoresinol-4- <i>O</i> -glucoside                                          | 15.17 | 519.1873 | others      | [M-H] <sup>-</sup> |
| 56 | Absciscic acid                                                              | 19.91 | 263.1290 | others      | [M-H] <sup>-</sup> |
| 57 | 2-Isopropylmalic acid                                                       | 5.11  | 175.0614 | others      | [M-H] <sup>-</sup> |
| 58 | Galactonic acid                                                             | 0.76  | 195.0511 | others      | [M-H] <sup>-</sup> |
| 59 | Pantothenic acid                                                            | 2.67  | 218.1032 | others      | [M-H] <sup>-</sup> |
| 60 | Dichlorogelignite                                                           | 5.23  | 705.1672 | others      | [M-H] <sup>-</sup> |
| 61 | Glucose                                                                     | 0.76  | 179.0562 | others      | [M-H] <sup>-</sup> |
| 62 | Citric acid                                                                 | 6.10  | 191.0186 | others      | [M-H] <sup>-</sup> |
| 63 | Malic acid                                                                  | 0.90  | 133.0131 | others      | [M-H] <sup>-</sup> |
| 64 | Fumaric acid                                                                | 0.90  | 115.0025 | others      | [M-H] <sup>-</sup> |
| 65 | Quinic acid                                                                 | 0.79  | 191.0561 | others      | [M-H] <sup>-</sup> |

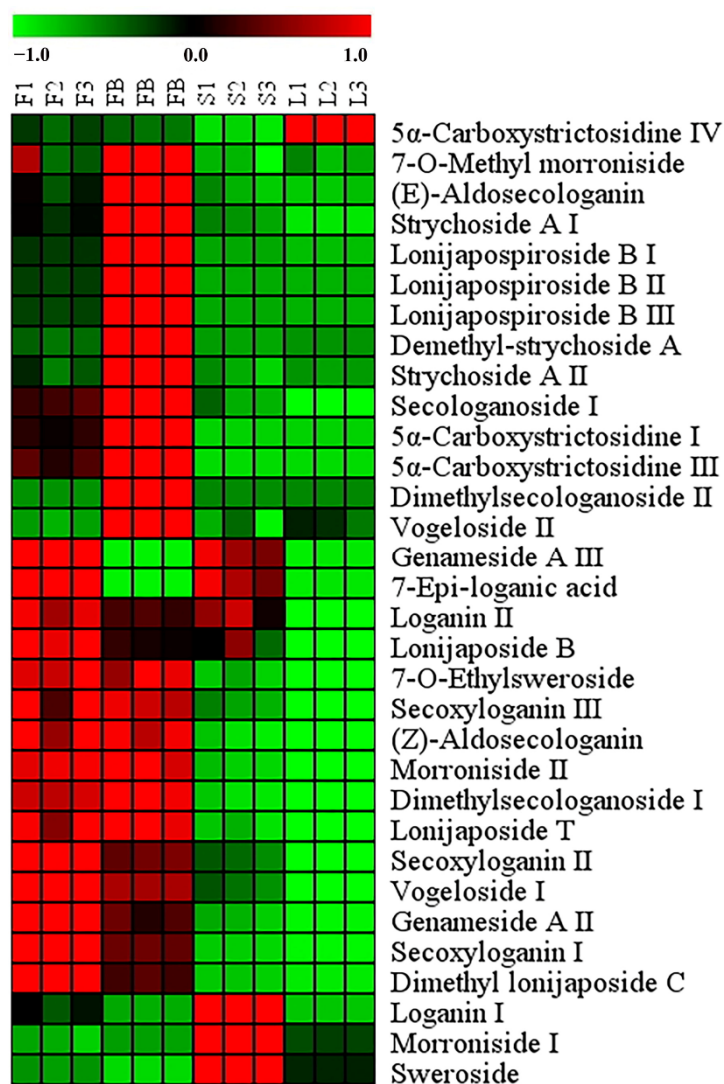

Figure S1. Heat map of differential iridoids in four different tissues of LJT.
